# Supplementary material for: Gene-by-Psychosocial Factor Interactions Influence Diastolic Blood Pressure in European and African Ancestry Populations: Meta-Analysis of Four Cohort Studies
Source: MDPI journal article supplement (doi:10.3390/ijerph14121596), 2017-12-18
Supplement: s1 [file s1]

**Supplemental Table 1: Study cohort characteristics**

| Cohort (Acronym)                                 | PMID                  | Sample Size <sup>a</sup> | Number of Exams <sup>b</sup> | Exam Dates | Genotyping Platform                        | Genotyping Exclusions Prior to Imputation                                                                                                                                  | Imputation Software   | Imputation Panel                                                      |
|--------------------------------------------------|-----------------------|--------------------------|------------------------------|------------|--------------------------------------------|----------------------------------------------------------------------------------------------------------------------------------------------------------------------------|-----------------------|-----------------------------------------------------------------------|
| Atherosclerosis Risk in Communities Study (ARIC) | 2646917               | 9,292 EA;<br>3,169 AA    | 4                            | 1987-1996  | Affymetrix Genome-Wide Human SNP Array 6.0 | SNPs with MAF<0.01, call rate<95%, HWE $p<10^{-5}$ ; individuals with gender mismatch, genetic outliers, first-degree relatives, concordance check with Taqman data>20%    | IMPUTE v2             | 1000 Genomes Project cosmopolitan reference panel, phase 1, version 3 |
| Health and Retirement Study (HRS)                | 24671021              | 9,441 EA;<br>2,060 AA    | 2                            | 2006-2012  | Illumina Infinium HumanOmni 2.5 BeadChip   | SNPs with call rate <98%, HWE $p<10^{-4}$ , chromosomal anomalies; individuals with call rate <98%, unresolved gender mismatches, first degree relatives, genetic outliers | IMPUTE v2             | 1000 Genomes Project cosmopolitan reference panel, phase 1, version 3 |
| Jackson Heart Study (JHS)                        | 16320381,<br>16317983 | 2,126 AA                 | 3                            | 2000-2013  | Affymetrix Genome-Wide Human SNP Array 6.0 | SNPs with MAF<0.01 and genotyping success rate <10%, HWE $p<10^{-6}$ , Mendelian errors, unresolved gender mismatches, genetic outliers                                    | MaCH (version 1.0.16) | 1000 Genomes Project cosmopolitan reference panel, phase 1, version 3 |
| Multi-Ethnic Study of Atherosclerosis (MESA)     | 12397006              | 2,525 EA;<br>1,609 AA    | 4                            | 2000-2007  | Affymetrix Genome-Wide Human SNP Array 6.0 | SNPs with call rate <95%, heterozygosity>53%; individuals with call rate<95%, unresolved gender mismatches, cryptic duplicates, genetic outliers                           | IMPUTE v2             | 1000 Genomes Project cosmopolitan reference panel, phase 1, version 3 |

<sup>a</sup> Sample size reflects number of participants with genotype data and all of the following data for at least one time point: SBP and/or DBP, at least one socioeconomic/psychosocial factor, and all adjustment variables.

<sup>b</sup> Maximum number of exams that blood pressure was measured for each participant.
