# Supplementary material for: Gene-by-Psychosocial Factor Interactions Influence Diastolic Blood Pressure in European and African Ancestry Populations: Meta-Analysis of Four Cohort Studies
Source: MDPI journal article supplement (doi:10.3390/ijerph14121596), 2017-12-18
Supplement: s1 [file s1]

**Supplemental Table 2: Demographic, blood pressure, socioeconomic, and psychosocial measures for each cohort**

| Variable            | ARIC   |        |        |        | HRS <sup>a</sup> |        | JHS    |        |        | MESA   |        |        |        |
|---------------------|--------|--------|--------|--------|------------------|--------|--------|--------|--------|--------|--------|--------|--------|
|                     | Exam 1 | Exam 2 | Exam 3 | Exam 4 | Exam 1           | Exam 2 | Exam 1 | Exam 2 | Exam 3 | Exam 1 | Exam 2 | Exam 3 | Exam 4 |
| Sex                 | x      | o      | o      | o      | x                | o      | x      | o      | o      | x      | o      | o      | o      |
| Age                 | x      | x      | x      | x      | x                | x      | x      | x      | x      | x      | x      | x      | x      |
| Body Mass Index     | x      | x      | x      | x      | x                | x      | x      | x      | x      | x      | x      | x      | x      |
| Systolic BP         | x      | x      | x      | x      | x                | x      | x      | x      | x      | x      | x      | x      | x      |
| Diastolic BP        | x      | x      | x      | x      | x                | x      | x      | x      | x      | x      | x      | x      | x      |
| Adult Education     | x      | o      | o      | o      | x                | o      | x      | o      | o      | x      | o      | o      | o      |
| Parental Education  | o      | o      | o      | x      | x                | o      | x      | o      | o      | o      | x      | o      | o      |
| Anger               | -      | x      | o      | x      | x                | x      | x      | o      | x      | x      | o      | x      | o      |
| Depressive Symptoms | -      | x      | o      | o      | x                | x      | x      | o      | o      | x      | o      | x      | o      |
| Chronic Burden      | -      | -      | -      | -      | x/- <sup>b</sup> | x      | -      | -      | x      | x      | o      | x      | o      |

x = exam that the variable was measured; o = exam that the variable was imputed (carried forward or, in the case of parental education, backward from a previous measure); dash (-) indicates that the variable was not measured or imputed for that exam.

<sup>a</sup> Blood pressure was measured at alternating exam dates (during the face-to-face exam only) for HRS participants. Exam 1 indicates the first exam at which blood pressure was measured (2006, 2008, or 2010).

<sup>b</sup> Number of chronic burdens was not measured in HRS in 2008.
