# Supplementary material for: Gene-by-Psychosocial Factor Interactions Influence Diastolic Blood Pressure in European and African Ancestry Populations: Meta-Analysis of Four Cohort Studies
Source: MDPI journal article supplement (doi:10.3390/ijerph14121596), 2017-12-18
Supplement: s1 [file s1]

**Supplemental Table 4: Number of SNPs in genomic regions selected for analysis**

| Genomic Region    | European Ancestry |      |      | African Ancestry |      |      |      | Average |
|-------------------|-------------------|------|------|------------------|------|------|------|---------|
|                   | ARIC              | HRS  | MESA | ARIC             | HRS  | MESA | JHS  |         |
| ARHGAP42          | 1269              | 1341 | 1230 | 1904             | 1874 | 1852 | 1246 | 1531    |
| ATP2B1            | 185               | 216  | 186  | 350              | 382  | 338  | 183  | 263     |
| BAG6 <sup>a</sup> | 45                | 46   | 39   | 35               | 40   | 44   | 1    | 36      |
| C10orf107         | 370               | 400  | 365  | 498              | 499  | 476  | 264  | 410     |
| CACNB2            | 1504              | 1578 | 1432 | 2510             | 2552 | 2158 | 1438 | 1882    |
| CSK               | 33                | 42   | 30   | 72               | 85   | 53   | 33   | 50      |
| FES               | 45                | 52   | 43   | 92               | 108  | 45   | 29   | 59      |
| GOSR2             | 364               | 385  | 337  | 478              | 502  | 448  | 238  | 393     |
| GUCY1A3           | 194               | 219  | 184  | 336              | 405  | 263  | 168  | 253     |
| HFE               | 57                | 59   | 54   | 84               | 83   | 78   | 46   | 66      |
| MECOM             | 1530              | 1643 | 1429 | 2217             | 2698 | 2158 | 1378 | 1865    |
| MTHFR             | 134               | 140  | 134  | 183              | 204  | 163  | 126  | 155     |
| NT5C2             | 256               | 272  | 253  | 326              | 365  | 317  | 166  | 279     |
| PLCE1             | 606               | 656  | 594  | 1230             | 1353 | 1179 | 723  | 906     |
| PLEKHA7           | 743               | 794  | 720  | 1208             | 1298 | 1101 | 711  | 939     |
| PLEKHG1           | 846               | 939  | 802  | 1406             | 1553 | 1166 | 840  | 1079    |
| rs10850411        | 428               | 446  | 411  | 673              | 737  | 574  | 345  | 516     |
| rs1173771         | 244               | 258  | 240  | 503              | 571  | 473  | 321  | 373     |
| rs11953630        | 317               | 318  | 314  | 489              | 556  | 477  | 321  | 399     |
| rs13082711        | 294               | 308  | 286  | 451              | 464  | 422  | 245  | 353     |
| rs13209747        | 174               | 200  | 164  | 396              | 391  | 360  | 229  | 273     |
| rs1327235         | 356               | 378  | 344  | 499              | 611  | 414  | 316  | 417     |
| rs1458038         | 301               | 317  | 281  | 523              | 610  | 389  | 276  | 385     |
| rs17428471        | 308               | 339  | 284  | 431              | 507  | 361  | 221  | 350     |
| rs2932538         | 158               | 211  | 149  | 197              | 374  | 219  | 133  | 206     |
| rs4373814         | 374               | 416  | 363  | 608              | 628  | 514  | 352  | 465     |
| rs7129220         | 300               | 331  | 284  | 434              | 478  | 384  | 229  | 349     |
| SH2B3             | 37                | 41   | 32   | 109              | 139  | 118  | 66   | 77      |
| SLC39A8           | 518               | 556  | 509  | 941              | 966  | 898  | 555  | 706     |
| SOX6              | 1209              | 1324 | 1278 | 2714             | 2823 | 2469 | 1375 | 1885    |
| ULK4              | 2072              | 2301 | 1972 | 4289             | 4444 | 4088 | 2629 | 3114    |
| ZNF652            | 184               | 190  | 171  | 322              | 323  | 297  | 193  | 240     |
| ZNF831            | 233               | 242  | 196  | 382              | 450  | 289  | 214  | 287     |

<sup>a</sup> JHS was excluded from analysis of the *BAG6* genomic region, due to the low number of SNPs meeting analysis criteria.
