# Supplementary material for: Gene-by-Psychosocial Factor Interactions Influence Diastolic Blood Pressure in European and African Ancestry Populations: Meta-Analysis of Four Cohort Studies
Source: MDPI journal article supplement (doi:10.3390/ijerph14121596), 2017-12-18
Supplement: s1 [file s1]

**Supplemental Table 3: Genomic regions selected for analysis**

| Genomic region   | GWAS Study                             | Chromosome | Start Position <sup>a</sup> | Stop Position <sup>a</sup> |
|------------------|----------------------------------------|------------|-----------------------------|----------------------------|
| <i>ARHGAP42</i>  | ICBP, 2011 [1]                         | 11         | 100553384                   | 100867668                  |
| <i>ATP2B1</i>    | ICBP, 2011 [1]                         | 12         | 89976828                    | 90108077                   |
| <i>BAG6</i>      | ICBP, 2011 [1]                         | 6          | 31606805                    | 31620953                   |
| <i>C10orf107</i> | ICBP, 2011 [1]                         | 10         | 63417719                    | 63531524                   |
| <i>CACNB2</i>    | ICBP, 2011 [1]                         | 10         | 18424606                    | 18835798                   |
| <i>CSK</i>       | ICBP, 2011 [1]                         | 15         | 75074425                    | 75095539                   |
| <i>FES</i>       | ICBP, 2011 [1]                         | 15         | 91421925                    | 91444006                   |
| <i>GOSR2</i>     | ICBP, 2011 [1]                         | 17         | 44995483                    | 45110003                   |
| <i>GUCY1A3</i>   | ICBP, 2011 [1]                         | 4          | 156582863                   | 156658501                  |
| <i>HFE</i>       | ICBP, 2011 [1]                         | 6          | 26082509                    | 26103571                   |
| <i>MECOM</i>     | ICBP, 2011 [1]                         | 3          | 168796287                   | 169386406                  |
| <i>MTHFR</i>     | ICBP, 2011 [1]                         | 1          | 11840780                    | 11871977                   |
| <i>NT5C2</i>     | ICBP, 2011 [1]                         | 10         | 104840940                   | 104958056                  |
| <i>PLCE1</i>     | ICBP, 2011 [1]                         | 10         | 95748746                    | 96097580                   |
| <i>PLEKHA7</i>   | Franceschini, 2013 [2]                 | 11         | 16794842                    | 17040990                   |
| <i>PLEKHG1</i>   | ICBP, 2011 [1]                         | 6          | 150915999                   | 151169799                  |
| rs10850411       | ICBP, 2011 [1]                         | 12         | 115337796                   | 115437796                  |
| rs1173771        | ICBP, 2011 [1]                         | 5          | 32765028                    | 32865028                   |
| rs11953630       | ICBP, 2011 [1]                         | 5          | 157795402                   | 157895402                  |
| rs13082711       | ICBP, 2011 [1]                         | 3          | 27487909                    | 27587909                   |
| rs13209747       | Franceschini, 2013 [2]                 | 6          | 127065454                   | 127165454                  |
| rs1327235        | ICBP, 2011 [1]                         | 20         | 10919030                    | 11019030                   |
| rs1458038        | ICBP, 2011 [1]                         | 4          | 81114723                    | 81214723                   |
| rs17428471       | Franceschini, 2013 [2]                 | 7          | 27287867                    | 27387867                   |
| rs2932538        | ICBP, 2011 [1]                         | 1          | 113196543                   | 113296543                  |
| rs4373814        | ICBP, 2011 [1]                         | 10         | 18369972                    | 18469972                   |
| rs7129220        | ICBP, 2011 [1]                         | 11         | 10300538                    | 10400538                   |
| <i>SH2B3</i>     | ICBP, 2011 [1]                         | 12         | 111838752                   | 111894427                  |
| <i>SLC39A8</i>   | ICBP, 2011 [1]                         | 4          | 103167198                   | 103357415                  |
| <i>SOX6</i>      | Franceschini, 2013 [2]                 | 11         | 15982995                    | 16766138                   |
| <i>ULK4</i>      | ICBP, 2011 [1]; Franceschini, 2013 [2] | 3          | 41283090                    | 42008922                   |
| <i>ZNF652</i>    | ICBP, 2011 [1]                         | 17         | 47361568                    | 47444835                   |
| <i>ZNF831</i>    | ICBP, 2011 [1]                         | 20         | 57735895                    | 57834168                   |

<sup>a</sup> Start and stop positions for the genomic region include buffers (+/-5kb for gene regions; +/-50kb for non-gene regions).

## References

1. International Consortium for Blood Pressure Genome-Wide Association Studies; Ehret, G.B.; Munroe, P.B.; Rice, K.M.; Bochud, M.; Johnson, A.D.; Chasman, D.I.; Smith, A.V.; Tobin, M.D.; Verwoert, G.C. *et al.* Genetic Variants in Novel Pathways Influence Blood Pressure and Cardiovascular Disease Risk. *Nature* **2011**, *478*, 103-109.
2. Franceschini, N.; Fox, E.; Zhang, Z.; Edwards, T.L.; Nalls, M.A.; Sung, Y.J.; Tayo, B.O.; Sun, Y.V.; Gottesman, O.; Adeyemo, A. *et al.* Genome-Wide Association Analysis of Blood-Pressure Traits in African-Ancestry Individuals Reveals Common Associated Genes in African and Non-African Populations. *Am. J. Hum. Genet.* **2013**, *93*, 545-554.
