# Supplementary material for: Gene-by-Psychosocial Factor Interactions Influence Diastolic Blood Pressure in European and African Ancestry Populations: Meta-Analysis of Four Cohort Studies
Source: Int J Environ Res Public Health. 2017 Dec 18;14(12):1596. doi: 10.3390/ijerph14121596 (PMC5751013; doi:10.3390/ijerph14121596)
Supplement: Supplementary file 1 [file ijerph-14-01596-s001.zip]

Archive with 5 entries (5 files):
- Smith IJERPH 10_01_2017 SuppTable4.pdf
- Smith IJERPH 10_01_2017 SuppText.pdf
- Smith IJERPH 10_01_2017 SuppTable1.pdf
- Smith IJERPH 10_01_2017 SuppTable2.pdf
- Smith IJERPH 10_01_2017 SuppTable3.pdf
